# Supplementary material for: Mechanisms of Abrupt Loss of Virus Control in a Cohort of Previous HIV Controllers
Source: PubMed Central journal article supplement (PMC6363998; doi:10.1128/jvi.01436-18), 2019-02-05
Supplement: a43aa757b3205769f9a5736545cfa275_JVI.01436-18-s0001.pdf [file a43aa757b3205769f9a5736545cfa275_JVI.01436-18-s0001.pdf]

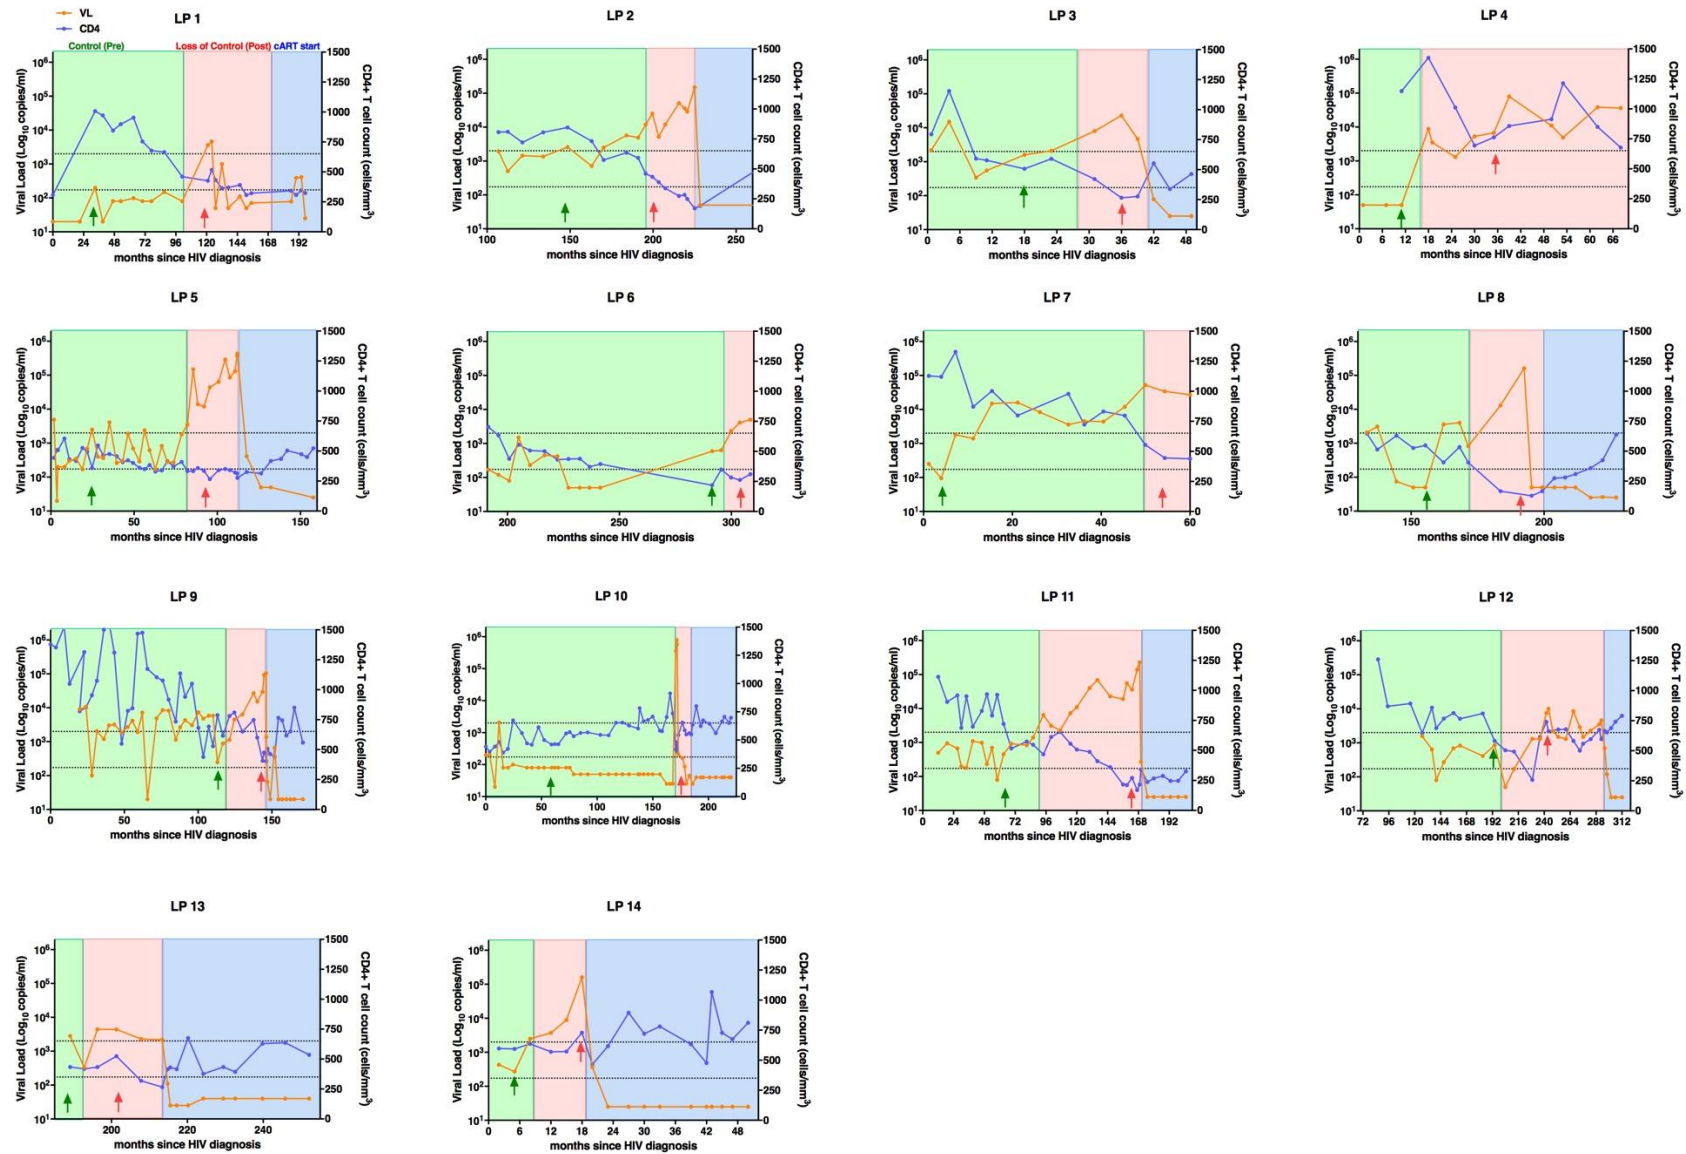

**Supplementary figure 1:** Evolution of viral load (orange lines) and CD4 counts (blue lines) of all individuals included in the study. Green area represents time with viral control, red area the loss of control and blue area the time during cART. Time points analyzed are marked with a green arrow for the time point with controlled infection and red for uncontrolled time point.

| HXB2      | MGARASVLSG | GELDRWEKIR        | LRPGGKKKYK | LKHIVWASRE | LERFAVNPGL | LETSEGCRQI | LGQLQPSLQT | GSEELRSLYN | TVATLYCVHQ |
|-----------|------------|-------------------|------------|------------|------------|------------|------------|------------|------------|
| LP1 post  | -----      | ---K---           | -----      | -----      | -----      | -----K--   | -E---A---  | -----K---  | -----K     |
| LP2 pre   | -----      | -K-Q---           | -----      | -----      | -----      | -----      | -----      | -----K---  | -----      |
| LP2 post  | -----      | -K-Q---           | -----      | -----      | -----      | -----      | -----      | -----K     | -----      |
| LP3 pre   | -----      | -K-K-R--          | -----R     | -----      | -----      | -----      | -----      | -----F-    | -I-----    |
| LP3 post  | -----      | -K- <u>K</u> -R-- | -----R     | -----      | -----      | -----      | -----      | -----F-    | -I-----    |
| LP4 pre   | -----      | -Q-K---           | -----S     | -----      | -----      | -----      | -----A---  | -----      | ---V-----  |
| LP4 post  | -----      | -K---R--          | -----Q-R   | -----      | -----      | -----K-    | IE-----    | -----F-    | -----E     |
| LP5 pre   | -----I--   | -----             | -----      | ---L---    | -----S-    | ---D-K--   | -----      | ---K-V--   | -I-----L-  |
| LP5 post  | -----I--   | -----Y            | -----R     | ---L---    | -----      | ---AD---   | -----      | ---K---    | -----R     |
| LP6 post  | -----      | -----             | -----      | -----      | -----      | ---K---    | -----      | ---K---    | ---V-----  |
| LP7 post  | -----      | -----             | ---Q-R     | ---L---    | -----      | ---K---    | -----      | ---F-      | ---V---R   |
| LP8 pre   | -----I--   | -----             | ---Q-R     | ---L---    | -----      | ---K---    | IR-----    | -----      | -----      |
| LP8 post  | -----I--   | -----             | ---Q-R     | ---L---    | -----      | ---K---    | IR-----    | -----      | -----      |
| LP9 pre   | -----      | ---K---           | ---Q-R     | -----      | -----      | ---KK-     | -K---A---  | -----      | -I-----    |
| LP9 post  | -----      | ---K---           | ---Q-R     | -----      | -----      | ---KK-     | -E---A---  | -----      | -I-----R   |
| LP10 post | -----      | EK-S---           | ---R       | ---L---    | ---L-D     | ---A-Q-    | M---A---   | -T---F-    | ---V-F---K |
| LP11 pre  | -----      | -K-Q---           | -----R     | -----      | -----      | ---AG-A-   | -T-----    | ---K---    | -----      |
| LP11 post | -----      | -K-Q---           | -----R     | -----      | -----      | ---AK-A-   | -T-----    | ---K---    | -I-V-----  |
| LP12 pre  | -----      | -K-Q-GE-          | -----      | -----      | -----      | I-----     | -----      | ---K---    | -----      |
| LP12 post | -----      | -K-Q---           | ---R       | -----      | -----      | I-----     | -----      | ---K---    | -----      |
| LP13 post | -----      | -----             | ---Q       | -----      | -----      | ---A---    | ---A---    | -----      | -----K     |
| LP14 pre  | -----      | -----             | -----      | -----      | ---D---    | -----      | IR-IP---   | ---F-      | ---V-----  |
| LP14 post | -----      | -----             | -----      | -----      | ---D---    | -----      | IR-IP---   | ---F-      | ---V-----  |

|           |                     |                     |            |            |            |                     |            |            |                   |
|-----------|---------------------|---------------------|------------|------------|------------|---------------------|------------|------------|-------------------|
| HXB2      | RIEIKDTKEA          | LDKIEEEQNK          | SKKKAQQAAA | DTGHSNQVSQ | NYPIVQNIQG | QMVHQAISPR          | TLNAWVKVVE | EKAFSPEVIP | MFSALSEGAT        |
| LP1 post  | -----               | -E-L-----           | -----TT-   | --RN-S---- | -----      | ----- <b>L</b> ---  | -----      | -----      | -----             |
| LP2 pre   | ---V-----           | -E-----             | -----AG-   | NNS-----   | -----      | -----               | -----      | -----      | -----             |
| LP2 post  | -----               | -E-----             | -----AG-   | DNS-----   | -----L-    | -----               | -----I-    | -----      | -----             |
| LP3 pre   | <b>G</b> --V-----   | ---V-----           | -----N-    | S-----     | -----L-    | -----               | -----I-    | -----      | --T-----          |
| LP3 post  | <b>G</b> --V-----   | ---V-----           | -----N-    | S-----     | -----L-    | -----L---           | -----I-    | -----      | --T-----          |
| LP4 pre   | ---VK-----          | -----               | -----S-    | -----      | -----L-    | -----               | -----      | -----      | -----             |
| LP4 post  | K---R---D-          | -----               | -----A-    | R-----     | -----L-    | -----P---           | -----I-    | -----      | --T-----          |
| LP5 pre   | -----               | -----               | -----      | -----      | -----      | -----               | -----      | -----      | -----             |
| LP5 post  | -----               | -----               | -----      | -----      | -----      | -----               | -----      | -----      | -----             |
| LP6 post  | K-----              | -----               | -----      | -----      | -----      | -----L-             | -----I-    | -----      | -----             |
| LP7 post  | -- <b>DI</b> -----  | -----               | ---S-K---T | --NNS----  | -----      | ----- <b>L</b> ---  | -----I-    | -----      | -----             |
| LP8 pre   | K--- <b>R</b> ----- | -----               | -----      | -----      | -----      | ----- <b>PL</b> --- | -----      | -----      | -----             |
| LP8 post  | K--- <b>R</b> ----- | -----               | I-----     | -----      | -----      | ----- <b>PL</b> --- | -----      | -----      | -----             |
| LP9 pre   | --D-----            | -D-----             | ---G-----  | -----      | -----      | -----               | -----      | -----      | -----             |
| LP9 post  | --D-----            | -D-----             | -----      | -----      | -----      | -----               | -----      | -----      | -----             |
| LP10 post | -K-----             | -E-V-KA- <b>K</b> - | GQE-Q-A-MD | EGS --A--  | -----A-    | -----               | -----      | -----      | -----             |
| LP11 pre  | --DV--Q--           | -E-----             | -----      | ---S-A--   | -----M-    | ----- <b>L</b> ---  | -----I-    | -----      | -----             |
| LP11 post | --DV--Q--           | -A-----             | -----      | ---D-S-A-  | -----M-    | ----- <b>L</b> ---  | -----I-    | -----      | -- <b>T</b> ----- |
| LP12 pre  | K--V-----           | -E-----             | -----      | -A-NNS---- | -----LH-   | ----- <b>L</b> ---  | -----I-    | -----      | -----A            |
| LP12 post | K--V-----           | -E-----             | -----      | -T-NNS---- | -----L-    | ----- <b>PL</b> --- | -----I-    | -----      | -----A            |
| LP13 post | --I-----            | -E-----             | -----      | --R-----   | -----I-    | -----               | -----      | -----      | -----             |
| LP14 pre  | KV-----             | -E- <b>L</b> ---K-  | -QQMT----- | -K- ---    | ---K----   | -----L---           | -----I-    | -----      | -----D---         |
| LP14 post | KV-----             | -E- <b>L</b> ---KE  | -QQTT----- | -K- ---    | ---K----   | -----L---           | -----I-    | -----      | -----D---         |

| HXB2      | PQDLNNTMLNT | VGGHQAAQM | LKETINEEAA | EWDRVHPVHA         | GPIAPGQMRE | PRGSDIAGTT | STLQEIQIGWM                       | TNNPPIPVGE  | IYKRWIILGL  |
|-----------|-------------|-----------|------------|--------------------|------------|------------|-----------------------------------|-------------|-------------|
| LP1 post  | -----       | -----     | -----      | -----              | -----      | -----      | <del>N</del> ----- <del>A</del>   | -----       | -----       |
| LP2 pre   | -----       | -----     | -----      | -----              | --V-----   | -----      | -----                             | -----       | -----       |
| LP2 post  | -----       | -----     | -----      | -----              | --V-----   | -----      | -----                             | -----       | -----       |
| LP3 pre   | -----       | -----     | --D-----   | -----              | --V-----   | -----      | -----                             | -S-----     | -----       |
| LP3 post  | -----       | -----     | --D-----   | -----              | --V-----   | -----      | -----                             | -----       | -----       |
| LP4 pre   | -----       | -----     | -----      | -----              | -----      | -----      | -----                             | -----       | -----       |
| LP4 post  | -----       | -----     | -----      | -----              | --V-----   | -----      | -----A-----                       | -----V----- | -----       |
| LP5 pre   | -----       | -----     | -----      | -----              | --V-----   | -----      | -----                             | -----       | -----       |
| LP5 post  | -----       | -----     | -----      | -----              | --V-----   | -----      | -----                             | -----       | -----       |
| LP6 post  | -----       | -----     | -----      | -----Q-----        | --L-----   | -----      | <del>N</del> A-- <del>V</del> A-- | -G-----     | -----       |
| LP7 post  | -----       | -----     | -----      | -----              | -----      | -----      | <del>N</del> ----- <del>A</del>   | -----       | -----       |
| LP8 pre   | -----       | -----     | -----      | <del>D</del> ----- | -----      | -----      | -----                             | -----       | -----       |
| LP8 post  | -----       | -----     | -----      | <del>D</del> ----- | -----      | -----      | -----                             | -H-----     | -----       |
| LP9 pre   | -----       | -----     | -----      | -----              | --V-----   | -----      | -----                             | -----       | -----M----- |
| LP9 post  | -----       | -----     | -----      | -----              | --V-----   | -----      | -----                             | -----       | -----M----- |
| LP10 post | -----       | -----     | --D-----   | ---M--PQ--         | --P--I--   | -----      | -N-----T-                         | -----       | -----       |
| LP11 pre  | -----       | -----     | -----      | -----              | --V-----   | -----      | <del>N</del> -----                | -----       | -----       |
| LP11 post | -----       | -----     | -----      | -----Q-----        | --V-----   | -----      | <del>N</del> -----                | -H-----     | -----       |
| LP12 pre  | -----       | -----     | -----      | -----              | --V-----   | -----      | -----                             | -----       | -----       |
| LP12 post | -----       | -----     | -----      | -----              | --A-----   | -----      | -----                             | -----       | -----       |
| LP13 post | -----       | -----     | -----      | -----              | -----      | -----      | -----                             | -----       | -----       |
| LP14 pre  | -----S      | -----     | --D--D--   | D--T--             | --P--      | -----      | --N-- <del>Q</del>                | -S--V--     | -----       |
| LP14 post | -----S      | -----     | --D-----   | ---T--             | --P--      | -----      | <del>N</del> N-- <del>Q</del>     | -S--V--     | -----       |

| HXB2      | NKIVRMYSPT     | SILDIRQGPK     | EPFRDYVDRF | YKTLRAEQAS     | QEVKNWMTET       | LLVQNaNPDC | KTILKALGPA      | ATLEEMMTAC | QGVGGPGHKA     |
|-----------|----------------|----------------|------------|----------------|------------------|------------|-----------------|------------|----------------|
| LP1 post  | -----          | -----          | -S-----    | -----          | -----            | -----      | -----           | -----      | -----          |
| LP2 pre   | -----C-V       | -----          | -----      | <b>R</b> ----- | -----            | -----      | -----           | -----      | -----          |
| LP2 post  | -----S-V       | <b>K</b> ----- | -----      | <b>V</b> ----- | -----            | -----      | -----G          | -----      | -----S         |
| LP3 pre   | -----          | -----          | -----      | -----          | -D-----          | -----      | -----G          | -----      | -----          |
| LP3 post  | -----          | <b>K</b> ----- | -----      | -----          | -D-----          | -----      | -----G          | -----      | <b>S</b> ----- |
| LP4 pre   | -----          | -K-----        | -----      | -R-----        | -----            | -----S     | -----           | -----      | -----          |
| LP4 post  | -----V         | -----          | -----      | -----          | <b>D</b> -A----- | -----      | ----- <b>SG</b> | -----S     | -----          |
| LP5 pre   | -----V         | -----          | -----      | -----          | -----            | -----      | -----           | -----      | -----S         |
| LP5 post  | -----V         | -----          | -----      | -----          | -----            | -----      | -N-----         | -----      | -----          |
| LP6 post  | -----          | -K-----        | -----      | -----          | <b>T</b> -----   | -----      | -----           | -----      | -----S         |
| LP7 post  | -----V         | -----          | -----      | -----          | -----            | -----      | -----           | -----      | -----          |
| LP8 pre   | -----V         | -K-----        | -----      | -----          | -D-----          | -----      | -----           | -----      | -----          |
| LP8 post  | -----          | -K-----        | -----      | -----          | -----            | -----      | -----           | -----      | -----          |
| LP9 pre   | -----          | -K-----        | -----      | -----          | -----            | -----      | -----           | -----      | -----          |
| LP9 post  | -----          | -K-----        | -----      | -----          | -----            | -----      | -----           | -----      | -----          |
| LP10 post | -----V         | -----          | -----      | -----T         | -----G--D        | -----      | -----R--G       | -S-----    | -----          |
| LP11 pre  | -----V         | -V-----        | -----      | -I-----        | <b>D</b> -----   | -----      | -----           | -----      | -----          |
| LP11 post | -----V         | -VK-----       | -----      | -I-----        | <b>D</b> -----   | -----      | -----           | -----      | -----          |
| LP12 pre  | -----V         | -----          | -----      | -----          | -----            | -----      | -----           | -----      | -----          |
| LP12 post | -----V         | -----          | -----      | -----          | -----            | -----      | -----           | -----      | -----          |
| LP13 post | ----- <b>S</b> | -----          | -----      | -----          | -----            | -----      | -----           | -----      | -----          |
| LP14 pre  | -----V         | -----          | -----      | F-----T        | -----            | -----      | -----           | -----      | -----          |
| LP14 post | -----V         | -----          | -----      | F-----T        | -----            | -----      | -----           | -----      | -----          |

|           |                              |             |               |            |                    |            |            |            |                 |
|-----------|------------------------------|-------------|---------------|------------|--------------------|------------|------------|------------|-----------------|
| HXB2      | RVLAEAMSQV                   | TNSA·TIMMQR | GNFRNQRKIV    | KCFNCGKEGH | TARNCRAPRK         | KGCWKCGKEG | HQMKDCTERQ | ANFLGKIWPS | YKGRPGNFLQ      |
| LP1 post  | -----G--A-----               |             |               |            | <b>R</b> -----     |            |            |            |                 |
| LP2 pre   | -----S--·N-----              |             |               |            | I-----             |            |            |            | H-----H-        |
| LP2 post  | -----S--·NV-----             |             | -----G--S-    |            | I-----             |            |            |            | H-----H-        |
| LP3 pre   | -----TP·N-----               |             | -----Y-----   |            | <b>L</b> -K-----   |            |            |            | NR-----         |
| LP3 post  | -----TP·N-----               |             | -----Y-----   |            | <b>L</b> -K-----   |            |            |            | HR-----         |
| LP4 pre   | -----·V-----                 |             |               |            |                    |            |            |            | -R-----         |
| LP4 post  | -----·-----G                 |             | -----K--G-T-  |            | -----V--           |            | -----I---  | -----V-S-  | -R-----         |
| LP5 pre   | -----·V-----                 |             |               |            | I- <b>R</b> -K---- | R-----     |            |            |                 |
| LP5 post  | -----·V-----                 |             |               |            | I- <b>R</b> -K---- | R-----     |            |            |                 |
| LP6 post  | -----A-----·V-----           |             | -----S-----   |            |                    | R-----     |            |            |                 |
| LP7 post  | -----·-----K                 |             | -----S-----SI |            | -----R-----        |            |            |            | <b>HR</b> ----- |
| LP8 pre   | -----·-----R                 |             |               |            | I- <b>R</b> -----  |            |            |            |                 |
| LP8 post  | -----·-----R                 |             |               |            | I- <b>R</b> -----  |            |            |            |                 |
| LP9 pre   | ----- <b>S</b> -----·-----M- |             |               |            | I- <b>R</b> -----  |            |            |            |                 |
| LP9 post  | -----·-----M-                |             |               |            | I- <b>R</b> -----  |            |            |            |                 |
| LP10 post | -----A--K·AT--K              |             | S--KGP-RQI    |            | L-----             |            |            |            | H-----          |
| LP11 pre  | -----P·-----                 |             |               |            | I-----             | R-----     |            |            | -----P-         |
| LP11 post | -----S·A--K                  |             |               |            | I-----             | R-----     |            |            | -----P-         |
| LP12 pre  | -----S·-----                 |             |               |            | I-R-----           |            |            |            | -----P-         |
| LP12 post | -----S·-----                 |             | -----P-       |            | I-R-----           |            |            |            | -----P-         |
| LP13 post | -----·-----                  |             |               |            | <b>R</b> -----     |            |            |            | H-----          |
| LP14 pre  | -----STN·-----               |             | S--KS--RM-    |            | -----D-            |            |            |            | N-----          |
| LP14 post | -----STN·-----               |             | S--KS--RM-    |            | -----V-            |            |            |            | N-----          |

|           |            |            |                     |              |             |
|-----------|------------|------------|---------------------|--------------|-------------|
| HXB2      | SRPEPTAPPE | ESFRSGVETT | TPPQKQEPID          | KELYP·LTSLR  | SLFGNDPSSQ  |
| LP1 post  | G-----     | ----F-E--- | --S---GQ--          | ---S-·-A---  | -----       |
| LP2 pre   | --L-----   | ----F-E--- | --S-----            | -----·-----  | -----       |
| LP2 post  | --L-----   | ----F-E--A | -----               | --M-·-A---   | -----       |
| LP3 pre   | -----P---- | ----F-E--- | --S---GQ--          | --V-·-----   | -----       |
| LP3 post  | -----P---- | ----F-E--- | --S---GQ--          | --V-·-----   | -----       |
| LP4 pre   | -----      | ---GF-G--- | --S-----            | --N-·-----   | -----       |
| LP4 post  | N-----     | ----F-E--- | --S---T--           | --K-·-----   | -----       |
| LP5 pre   | -----      | -----P     | --S-----            | -----·-----  | -----       |
| LP5 post  | -----      | -----P     | --S-----            | -----·-----  | -----       |
| LP6 post  | --L-----   | -----M-    | --S-----            | -----·-----  | -----       |
| LP7 post  | -----      | ----F-E--- | --S---K-            | Q-K-·-A---   | -----       |
| LP8 pre   | N-----     | ----F-E--- | --S-----            | -----·-----  | -----       |
| LP8 post  | N-----     | ----F-E--- | --S-----            | -----·-----  | -----       |
| LP9 pre   | -----      | ----F-E--A | --S-----            | -----·-----  | -----       |
| LP9 post  | -----      | ----F-E--A | --S-----            | -----·-----  | -----       |
| LP10 post | -----A     | ---GF-E-IA | P- L---TKK          | E-----·-A--K | -----S----- |
| LP11 pre  | --L-----   | ----F-E--- | --SR-P- <b>L</b> -- | -D-S-·-A---  | -----       |
| LP11 post | --L-----   | ----F-EG-- | --SR-P- <b>L</b> -- | -D-S-·-A---  | -----       |
| LP12 pre  | --L-----   | ----F-E--- | --S-----            | --M-·-----   | -----       |
| LP12 post | --L-----   | ----F-EG-- | --S-----            | --M-·-----   | -----       |
| LP13 post | --L-----   | -----E---  | --S-----            | ---H-·-----  | -----       |
| LP14 pre  | N-----A    | ---GF-E- I | ---P---QKT          | EG---P-A---  | R-----      |
| LP14 post | N-----A    | ---GF-E- I | ---P---QKT          | EG---P-A---  | R-----      |

**Supplementary figure 2:** Alignment of Gag sequences obtained for each individual (pre and post LoC) to HXB2 sequence. HLA-associated footprints are marked in red.

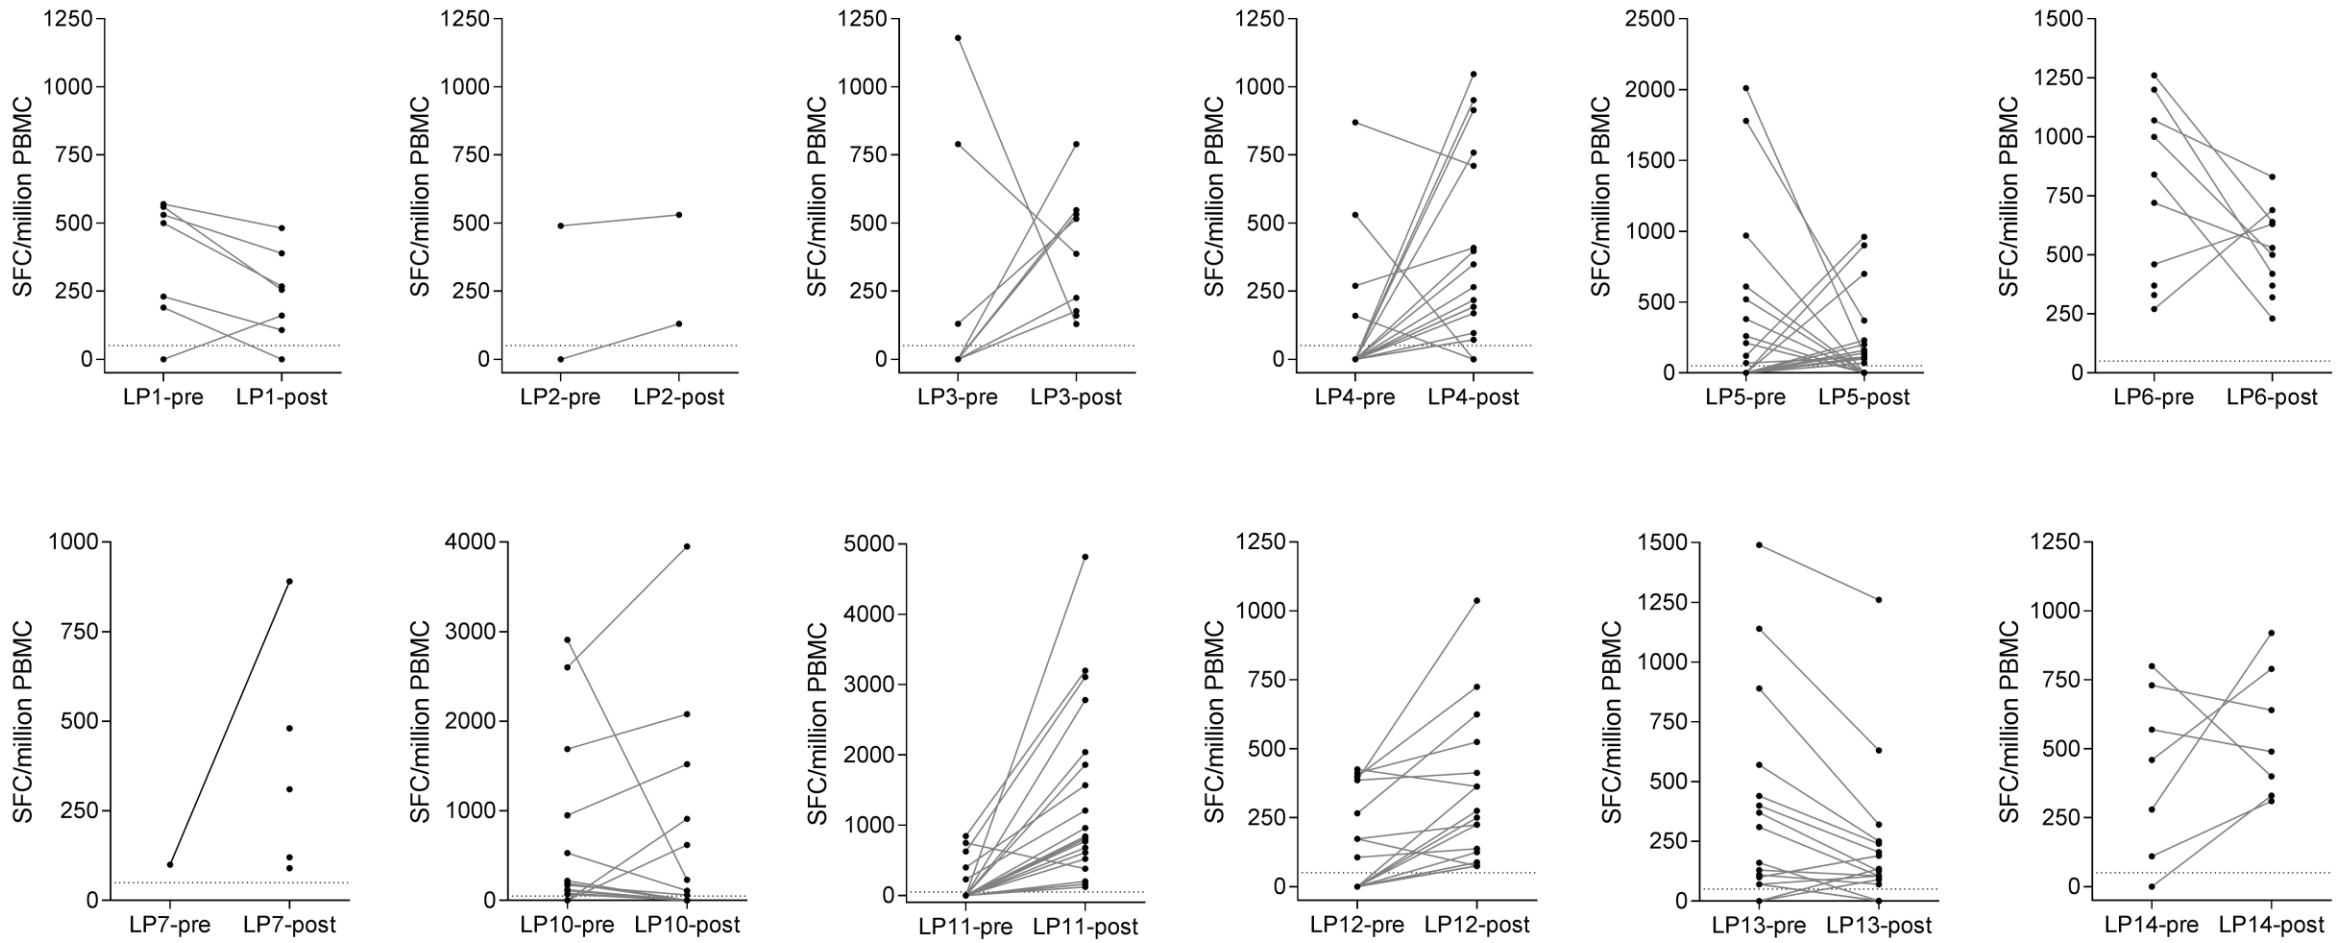

**Supplementary Figure 3:** Individual HIV-specific responses. Magnitude of CD8+ T cell HIV-specific responses expressed as SFC/ million PBMC is shown longitudinally before and after progression (n=12).



**Supplementary table 1:** Clinical characteristics of patients with persistent HIV control (long-term controllers).

| <b>ID (EC/VC)</b> | <b>Age, years*</b> | <b>Gender</b> | <b>Time since known HIV-1 infection (years)*</b> | <b>Log<sub>10</sub> of viral load at 1<sup>st</sup> Follow-up timepoint studied</b> | <b>Log<sub>10</sub> of viral load at 2<sup>nd</sup> Follow-up timepoint studied</b> | <b>CD4 cells/mm<sup>3</sup> at 1<sup>st</sup> Follow-up timepoint studied</b> | <b>CD4 cells/mm<sup>3</sup> at 2<sup>nd</sup> Follow-up timepoint studied</b> | <b>HLA A</b> | <b>HLA B</b> | <b>HLA C</b> | <b>HLA DRB</b> | <b>HLA DQB</b> |
|-------------------|--------------------|---------------|--------------------------------------------------|-------------------------------------------------------------------------------------|-------------------------------------------------------------------------------------|-------------------------------------------------------------------------------|-------------------------------------------------------------------------------|--------------|--------------|--------------|----------------|----------------|
| VC-2515           | 49                 | Male          | 16                                               | UD                                                                                  | 2,95                                                                                | 777 (29%)                                                                     | 979 (29%)                                                                     | 0101/3201    | 4002/5701    | 0202/0602    | 0701/1301      | 0303/0603      |
| VC-9540           | 63                 | Female        | 27                                               | UD                                                                                  | 2,83                                                                                | 529 (25%)                                                                     | 503 (29%)                                                                     | 0101/2902    | 4403/5701    | 0401/0602    | 0701/1101      | 0202/0301      |
| EC-1668           | 42                 | Female        | 15                                               | UD                                                                                  | UD                                                                                  | 1201 (40%)                                                                    | 785 (44%)                                                                     | 0201/0205    | 3905/5701    | 0602/1203    | 1301/1601      | 0502/0609      |
| EC-2143           | 55                 | Female        | 20                                               | UD                                                                                  | UD                                                                                  | 717 (33%)                                                                     | 454 (27%)                                                                     | 1101/2402    | 3501/5201    | 0401/1202    | 1301/1502      | 0601/0603      |
| EC-3901           | 47                 | Female        | 17                                               | UD                                                                                  | UD                                                                                  | 1201 (44%)                                                                    | 689 (37%)                                                                     | 0101/0201    | 0801/5701    | 0602/0701    | 0301/0701      | 0201/0303      |
| EC-1530           | 50                 | Male          | 28                                               | UD                                                                                  | 1,68                                                                                | 564 (22%)                                                                     | 706 (31%)                                                                     | 0201/3303    | 1302/5801    | 0302/0602    | 0701/1302      | 0202/0609      |
| EC-9079           | 55                 | Female        | 24                                               | UD                                                                                  | 2,30                                                                                | 645 (43%)                                                                     | 450 (36%)                                                                     | 0301/1101    | 0702/2705    | 0102/0702    | 0301/1101      | 0201/0301      |
| EC-9080           | 53                 | Male          | 22                                               | UD                                                                                  | UD                                                                                  | 440 (25%)                                                                     | 493 (29%)                                                                     | 0205/3101    | 4901/5101    | 0701/1502    | 1201/1301      | 0301/0603      |

*\*Age and HIV duration is shown for the latest timepoint analyzed. EC: elite controller. VC: viremic controller*
